# Supplementary material for: Use of Fixed Dose Combination (FDC) Drugs in India: Central Regulatory Approval and Sales of FDCs Containing Non-Steroidal Anti-Inflammatory Drugs (NSAIDs), Metformin, or Psychotropic Drugs
Source: PLoS Med. 2015 May 12;12(5):e1001826. doi: 10.1371/journal.pmed.1001826 (PMC4428752; doi:10.1371/journal.pmed.1001826)
Supplement: S2 Table — NSAID FDC formulations marketed in India categorised by formulations marketed before 1 May 2002 and after 1 May 2002. Sales volume (millions of doses [tablets/capsules]) and value (millions of Indian rupees) in amounts and as proportions of total volume and value; numbers of branded products of each formulation on the market by October 2012; numbers of products with sales recorded in 2012; market launch date for the first FDC product; CDSCO first approval date for the formulation; summary of CDSCO-approved and unapproved formulations and sales volumes before/after 1 May 2002 and overall. FDC formulations on the market with and without a record of CDSCO approval are termed respectively “approved” and “unapproved”. Data sources: PharmaTrac; CDSCO-published list of FDC approvals 1961–February 2013. (XLSX) [file pmed.1001826.s002.xlsx]

## Sheet: S2 Table NSAIDs
Formulations marketed Pre-1st May2002	FDC Volume in Units Nov11-Oct12	% Total FDC volume	FDC Value Nov11-Oct12	% Total FDC value	Products	Market launch date Pharmatrac	CDSCO Approval date	CDSCO Approval
IBUPROFEN + PARACETAMOL | M1A31	240046587	0.327537	2.41718e+09	0.132638	158	1986-06-01	1984-10-01	y
ACECLOFENAC + PARACETAMOL | M1A3	71499837	0.0975597	1.71361e+09	0.0940311	327	2001-06-01	2004-07-08	y
DICLOFENAC + SERRATIOPEPTIDASE | M1A15	16174221	0.0220693	9.17511e+08	0.0503466	246	2001-01-01	2008-01-24	y
DICLOFENAC + PARACETAMOL | M1A14	79739495	0.108803	1.46721e+09	0.0805101	289	2001-03-01	2008-01-30	y
NIMESULIDE + PARACETAMOL | M1A54	55753021	0.0760736	1.38074e+09	0.0757656	292	2001-01-01	4y >4yrs	y
DICLOFENAC + PARACETAMOL + CHLORZOXAZONE | M1A25	13966434	0.0190568	5.86585e+08	0.0321877	215	2001-03-01		not listed
DICLOFENAC + TIZANIDINE | M1A19	37637	5.13547e-05	1536339	8.43035e-05	16	2001-07-01		not listed
IBUPROFEN + PARACETAMOL + CHLORZOXAZONE | M1A112	8771060	0.0119679	7.92235e+07	0.00434723	8	1997-05-01		not listed
MEFENAMIC ACID + DICYCLOMINE | A3D8	34241118	0.0467211	7.07136e+08	0.0388027	103	2001-08-01		not listed
MEFENAMIC ACID + DROTAVERINE | A3E6	4990134	0.00680891	2.20797e+08	0.0121158	41	2001-12-01		not listed
MEFENAMIC ACID + PARACETAMOL | M1A47	5665154	0.00772996	1.26563e+08	0.00694488	25	2001-10-01		not listed
MELOXICAM + PARACETAMOL | M1A50	22805	3.11168e-05	166705	9.14758e-06	1	2000-12-01		not listed
NIMESULIDE + CAMYLOFIN | M1A127	401755	0.000548184	1.33213e+07	0.000730978	2	2002-03-01		not listed
NIMESULIDE + CHLORZOXAZONE | M1A59	219276	0.000299196	6.61502e+06	0.000362986	8	2001-04-01		not listed
NIMESULIDE + DICYCLOMINE | A3D9	909473	0.00124095	2.22344e+07	0.00122007	26	2001-03-01		not listed
NIMESULIDE + METHOCARBAMOL | M1A60	839	1.14479e-06	37436.2	2.05424e-06	1	2001-01-01		not listed
NIMESULIDE + PARACETAMOL + CHLORZOXAZONE | M1A104	407077	0.000555446	1.07042e+07	0.000587373	11	2001-10-01		not listed
NIMESULIDE + SERRATIOPEPTIDASE | M1A57	4798026	0.00654678	2.15492e+08	0.0118247	64	2001-03-01		not listed
NIMESULIDE + TIZANIDINE | M1A58	2082724	0.00284182	9.71105e+07	0.00532875	62	2000-12-01		not listed
Totals: Pre-1 May 2002 Products	539726673	0.736443	9.98378e+09	0.54784	1895
Total, 2011-12 Units	732882928		1.82239e+10
Total FDC Volume millions tablets/capsules	7328.83m	Value INR	18223.9m
Formulations marketed Post-1st May2002	FDC Volume in Units Nov11-Oct12	% Total FDC volume	FDC Value Nov11-Oct12	% Total FDC value	Products	Market launch date Pharmatrac	CDSCO Approval date	CDSCO Approval
MEFENAMIC ACID + TIZANIDINE | M1A48	212337	0.000289728	6.53029e+06	0.000358336	2	2003-03-01	2002-07-12	y
DEXKETOPROFEN + PARACETAMOL + DICYCLOMINE | M1A158	24770	3.3798e-05	1.60411e+06	8.80221e-05	1	2011-06-01	2002-11-01	y
IBUPROFEN + PARACETAMOL + CODEINE | M1A128	3	4.09342e-09	102.42	5.62009e-09	1	2005-05-01	2003-01-01	y
VALDECOXIB + PARACETAMOL | M1A73	14308	1.95229e-05	512758	2.81366e-05	10	2004-03-01	2004-09-20	y
MEFENAMIC ACID + TRANEXAMIC ACID | B2A6	6232258	0.00850376	6.45549e+08	0.0354232	72	2002-09-01	2005-02-22	y
DICLOFENAC + MISOPROSTOL | M1A106	456167	0.000622428	3.79741e+07	0.00208375	3	2005-09-01	2006-02-28	y
DEXKETOPROFEN + PARACETAMOL | M1A86	62610	8.54297e-05	3.60884e+06	0.000198028	2	2006-11-01	2006-10-18	y
DICLOFENAC + DICYCLOMINE | A3D1	6407070	0.00874228	8.57552e+07	0.00470565	22	2003-01-01	2008-01-28	y
DICLOFENAC + RABEPRAZOLE | M1A18	1756079	0.00239612	7.39566e+07	0.00405822	18	2003-03-01	2008-01-31	y
ACECLOFENAC + DIACEREIN | M1A100	281039	0.000383471	2.34401e+07	0.00128623	8	2007-07-01	2008-04-11	y
ACECLOFENAC + DROTAVERINE| A3E8	1468842	0.0020042	8.67096e+07	0.00475802	6	2007-07-01	2008-09-15	y
ETORICOXIB + PARACETAMOL | M1A96	1264199	0.00172497	6.1444e+07	0.00337162	3	2007-04-01	2008-09-30	y
DICLOFENAC + THIOCOLCHICOSIDE | M1A92	3673583	0.00501251	3.29e+08	0.0180532	18	2007-04-01	2008-10-21	y
KETOPROFEN + THIOCOLCHICOSIDE | M1A94	547919	0.000747621	6.06561e+07	0.00332838	3	2007-09-01	2008-11-06	y
NAPROXEN + SUMATRIPTAN | N2C11	526340	0.000718177	2.53213e+07	0.00138946	1	2010-07-01	2008-11-24	y
LORNOXICAM + PARACETAMOL | M1A84	5705448	0.00778494	2.31526e+08	0.0127045	39	2007-04-01	2009-02-05	y
ACECLOFENAC + TIZANIDINE | M1A5	8031	1.09581e-05	238922	1.31104e-05	1	2007-04-01	2009-02-23	y
ACECLOFENAC + RABEPRAZOLE | M1A125	5002964	0.00682642	2.65213e+08	0.014553	2	2007-04-01	2009-07-01	y
ACECLOFENAC + THIOCOLCHICOSIDE | M1A91	4528140	0.00617853	4.58511e+08	0.0251599	17	2006-07-01	2009-08-03	y
ETODOLAC + PARACETAMOL | M1A90	4598436	0.00627445	2.62456e+08	0.0144018	11	2007-04-01	2009-10-20	y20oct09
PIROXICAM + PARACETAMOL| M1A157	243422	0.000332143	6.02713e+06	0.000330727	1	2010-08-01	2010-01-19	y
DICLOFENAC + CHLORZOXAZONE | M1A20	0	0	0	0	1	2007-08-01	2010-03-16	y
LORNOXICAM + THIOCOLCHICOSIDE | M1A85	717020	0.000978355	9.64862e+07	0.00529449	9	2007-04-01	2010-03-23	y
IBUPROFEN + CHLORZOXAZONE | M1A33	0	0	0	0	1	2009-04-01	2010-07-04	y
ETODOLAC + THIOCOLCHICOSIDE | M1A108	1053615	0.00143763	1.04799e+08	0.00575066	4	2009-10-01	2010-07-19	y
ETODOLAC + TOLPERISONE | M1A156	160107	0.000218462	1.26294e+07	0.000693014	1	2011-02-01	2010-10-11	y
DEXKETOPROFEN + DICYCLOMINE | M1A154	24301	3.31581e-05	968402	5.31391e-05	1	2011-06-01	2011-04-28	y
DEXKETOPROFEN + SERRATIOPEPTIDASE | M1A152	52303	7.13661e-05	3.78569e+06	0.000207732	2	2011-05-01	2011-05-01	y
DEXIBUPROFEN + PARACETAMOL | M1A129	10288	1.40377e-05	177186	9.72275e-06	4	2006-11-01	2014-01-01	y
ACECLOFENAC + PARACETAMOL + CHLORZOXAZONE | M1A9	6348002	0.00866169	1.92605e+08	0.0105688	69	2002-07-01		not listed
ACECLOFENAC + PARACETAMOL + SERRATIOPEPTIDASE | M1A7	32660991	0.0445651	1.29369e+09	0.0709887	139	2004-10-01		not listed
ACECLOFENAC + PARACETAMOL + TRYPSIN-CHYMOTRYPSIN | M1A155	740632	0.00101057	3.96592e+07	0.00217622	2	2011-11-01		not listed
ACECLOFENAC + THIOCOLCHICOSIDE + PARACETAMOL | M1A93	2468087	0.00336764	2.57402e+08	0.0141244	16	2006-07-01		not listed
DICLOFENAC + PARACETAMOL + CHLORPHENIRAMINE | M1A23	612322	0.000835498	4.38342e+06	0.000240531	8	2004-11-01		not listed
DICLOFENAC + PARACETAMOL + CHYMOTRYPSIN + TRYPSIN | M1A114	3380836	0.00461306	1.93582e+08	0.0106224	3	2005-11-01		not listed
DICLOFENAC + PARACETAMOL + DEXTROPROPOXYPHENE | M1A24	75545	0.000103079	2.54727e+06	0.000139777	4	2007-04-01		not listed
DICLOFENAC + PARACETAMOL + FAMOTIDINE | M1A143	442494	0.000603772	5.94896e+06	0.000326437	3	2005-11-01		not listed
DICLOFENAC + PARACETAMOL + METHOCARBAMOL | M1A27	477943	0.000652141	2.56186e+07	0.00140577	4	2007-04-01		not listed
DICLOFENAC + PARACETAMOL + RABEPRAZOLE | M1A136	8044	1.09758e-05	377666	2.07237e-05	1	2007-11-01		not listed
DICLOFENAC + PARACETAMOL + SERRATIOPEPTIDASE | M1A22	12294993	0.0167762	6.08184e+08	0.0333729	94	2003-06-01		not listed
ACECLOFENAC + BETACYCLODEXTRINE | M1A2	1076524	0.00146889	3.8449e+07	0.00210981	2	2005-08-01		not listed
ACECLOFENAC + CHLORZOXAZONE | M1A6	0	0	0	0	1	2007-04-01		not listed
ACECLOFENAC + MISOPROSTOL | M1A151	71355	9.73621e-05	5.26425e+06	0.000288865	1	2010-12-01		not listed
ACECLOFENAC + PARACETAMOL + RABEPRAZOLE | M1A107	9508248	0.0129738	2.35799e+08	0.012939	4	2003-07-01		not listed
ACECLOFENAC + PARACETAMOL + SERRATIOPEPTIDASE + TIZANIDINE | M1A103	0	0	0	0	1	2005-06-01		not listed
ACECLOFENAC + PARACETAMOL + TIZANIDINE | M1A8	4786643	0.00653125	2.07302e+08	0.0113753	7	2004-09-01		not listed
ACECLOFENAC + PARACETAMOL + TRAMADOL | M1A118	1499225	0.00204565	8.86225e+07	0.00486298	6	2003-07-01		not listed
ACECLOFENAC + SERRATIOPEPTIDASE | M1A4	2083218	0.0028425	9.20999e+07	0.0050538	18	2004-11-01		not listed
ACECLOFENAC + TRAMADOL | M1A123	58905	8.03744e-05	2.51996e+06	0.000138278	1	2006-02-01		not listed
ACECLOFENAC + TRYPSIN-CHYMOTRYPSIN | M1A105	741	1.01108e-06	34197.2	1.8765e-06	2	2005-09-01		not listed
ASPIRIN + CAFFIENE | M1A113	10366232	0.0141445	1.23853e+08	0.00679621	5	2007-04-01		not listed
ASPIRIN + PARACETAMOL + CAFFEINE | M1A97	12131	1.65524e-05	167171	9.1732e-06	2	2007-04-01		not listed
DICLOFENAC + CAMYLOFIN | A3A20	2612903	0.00356524	5.3532e+07	0.00293746	6	2003-03-01		not listed
DICLOFENAC + CHLORZOXAZONE + TRAMADOL | M1A139	275055	0.000375306	3.63867e+06	0.000199665	1	2008-01-01		not listed
DICLOFENAC + DICYCLOMINE + PARACETAMOL | A3D2	719203	0.000981334	1.70721e+07	0.000936796	8	2004-01-01		not listed
DICLOFENAC + DROTAVERINE | A3E14	256365	0.000349803	1.03842e+07	0.000569812	1	2007-08-01		not listed
DICLOFENAC + FAMOTIDINE | M1A17	247186	0.000337279	6.3669e+06	0.000349371	5	2002-11-01		not listed
DICLOFENAC + NIMESULIDE | M1A13	107796	0.000147085	1.20252e+06	6.59857e-05	16	2004-03-01		not listed
DICLOFENAC + OMEPRAZOLE | M1A120	23003	3.1387e-05	558938	3.06706e-05	1	2006-01-01		not listed
DICLOFENAC + PANTOPRAZOLE | M1A121	71605	9.77032e-05	2.7317e+06	0.000149897	2	2006-03-01		not listed
DICLOFENAC + PARACETAMOL + TIZANIDINE | M1A26	72105	9.83854e-05	826412	4.53477e-05	10	2003-05-01		not listed
DICLOFENAC + PARACETAMOL + TRAMADOL | M1A132	68314	9.32127e-05	683140	3.74859e-05	1	2007-12-01		not listed
DICLOFENAC + SERRATIOPEPTIDASE + TIZANIDINE | M1A16	440	6.00369e-07	21938.1	1.20381e-06	1	2007-04-01		not listed
DICLOFENAC + TRIPSIN-CHYMOTRIPSIN | M1A21	3624807	0.00494596	2.44114e+08	0.0133953	4	2004-09-01		not listed
DICLOFENAC + PARACETAMOL + OMEPRAZOLE | M1A144	404989	0.000552597	1.82043e+07	0.000998922	1	2010-12-01		not listed
ETORICOXIB + THIOCOLCHICOSIDE | M1A109	2720958	0.00371268	3.22275e+08	0.0176842	5	2008-04-01		not listed
IBUPROFEN + CARISOPRODOL | M1A34	0	0	0	0	1	2008-07-01		not listed
IBUPROFEN + DEXTROPROPOXYPHENE | M1A41	757123	0.00103307	8.43159e+06	0.000462666	6	2007-04-01		not listed
IBUPROFEN + METHOCARBAMOL | M1A35	3885	5.30098e-06	164631	9.03381e-06	3	2007-04-01		not listed
IBUPROFEN + PARACETAMOL + CAFFEINE | M1A38	14553668	0.0198581	1.2241e+08	0.006717	7	2003-01-01		not listed
IBUPROFEN + PARACETAMOL + CHLORMEZANONE | M1A131	16490	2.25002e-05	911153	4.99977e-05	3	2007-04-01		not listed
IBUPROFEN + PARACETAMOL + DEXTROPROPOXYPHENE | M1A39	216294	0.000295128	5.09697e+06	0.000279686	5	2007-04-01		not listed
IBUPROFEN + PARACETAMOL + FAMOTIDINE | M1A135	43179	5.89166e-05	498286	2.73424e-05	1	2008-02-01		not listed
IBUPROFEN + PARACETAMOL + MAGNESIUM TRISILICATE | M1A37	9492	1.29516e-05	200535	1.10039e-05	7	2007-04-01		not listed
IBUPROFEN + PARACETAMOL + METHOCARBAMOL | M1A40	0	0	0	0	2	2007-04-01		not listed
IBUPROFEN + PARACETAMOL + SERRATIOPEPTIDASE | M1A36	3800	5.185e-06	158915	8.72014e-06	3	2004-05-01		not listed
IBUPROFEN + PSEUDOEPHIDRINE | M1A116	5137	7.00931e-06	23069.1	1.26587e-06	3	2007-04-01		not listed
IBUPROFEN + TIZANIDINE | M1A32	474368	0.000647263	5.9454e+06	0.000326242	5	2007-04-01		not listed
INDOMETHACIN + PARACETAMOL | M1A43	70065	9.56019e-05	1.79192e+06	9.83279e-05	2	2007-04-01		not listed
LORNOXICAM + PARACETAMOL + CHLORZOXAZONE | M1A149	1766	2.40966e-06	114750	6.29667e-06	1	2011-06-01		not listed
LORNOXICAM + PARACETAMOL + SERRATIOPEPETIDASE | M1A117	77078	0.000105171	5.39241e+06	0.000295898	2	2010-03-01		not listed
LORNOXICAM + PARACETAMOL + TRYPSIN + CHYMOTRYPSIN | M1A160	1319	1.79974e-06	204458	1.12192e-05	1	2012-08-01		not listed
LORNOXICAM + TRAMADOL + PARACETAMOL | M1A153	26440	3.60767e-05	2.0142e+06	0.000110525	1	2011-05-01		not listed
MEFENAMIC ACID + CAMYLOFIN| A3A28	1343488	0.00183315	4.49874e+07	0.00246859	3	2008-11-01		not listed
MEFENAMIC ACID + DICYCLOMINE + PARACETAMOL | A3D7	223813	0.000305387	5.04585e+06	0.000276881	7	2003-03-01		not listed
MEFENAMIC ACID + FAMOTIDINE + DICYCLOMINE | M1A126	13438	1.83358e-05	220737	1.21125e-05	1	2007-04-01		not listed
MEFENAMIC ACID + FEOTAVERINE | A3E15	5345	7.29312e-06	160891	8.82858e-06	1	2011-10-01		not listed
MEFENAMIC ACID + IBUPROFEN | M1A141	73159	9.98236e-05	1.45147e+06	7.96468e-05	1	2007-04-01		not listed
NABUMETONE + PARACETAMOL | M1A134	98426	0.0001343	5.21577e+06	0.000286205	1	2007-06-01		not listed
NAPROXEN + DOMPERIDONE | N2C10	2386164	0.00325586	7.7106e+07	0.00423104	4	2006-08-01		not listed
NAPROXEN + PARACETAMOL | M1A147	1003421	0.00136914	1.62954e+07	0.000894177	1	2006-08-01		not listed
NIMESULIDE - CETIRIZINE - PARACETAMOL - CAFFIENE | R6A38	171276	0.000233702	5.55356e+06	0.00030474	2	2010-10-01		not listed
NIMESULIDE + ANALGIN | M1A140	26590	3.62814e-05	123523	6.77809e-06	1	2007-08-01		not listed
NIMESULIDE + CAFFEINE + DEXCHLORPHENIRAMINE | R5D76	0	0	0	0	1	2007-04-01		not listed
NIMESULIDE + DROTAVERINE | A3E9	2478003	0.00338117	75044825	0.00411793	3	2006-03-01		not listed
NIMESULIDE + PARACETAMOL + DEXTROPROPOXYPHENE | M1A55	1077108	0.00146969	3.80948e+07	0.00209038	5	2002-11-01		not listed
NIMESULIDE + PARACETAMOL + SERRATIOPEPTIDASE | M1A119	3281832	0.00447798	1.4805e+08	0.00812393	9	2005-09-01		not listed
NIMESULIDE + PARACETAMOL + TIZANIDINE | M1A56	691761	0.00094389	2.37241e+07	0.00130181	5	2002-08-01		not listed
OXYPHENBUTAZONE + PARACETAMOL | M1A133	29147	3.97703e-05	833386	4.57304e-05	2	2007-04-01		not listed
PHENYLBUTAZONE + PARACETAMOL | M1A64	70	9.55132e-08	1243.9	6.82565e-08	1	2007-04-01		not listed
ROFECOXIB + PARACETAMOL | M1A111	7160	9.76964e-06	115395	6.33208e-06	8	2003-07-01		not listed
ROFECOXIB + TIZANIDINE | M1A67	0	0	0	0	3	2004-03-01		not listed
VALDECOXIB + SERRATIOPEPTIDASE | M1A75	0	0	0	0	2	2004-03-01		not listed
VALDECOXIB + TIZANIDINE | M1A74	3259	4.44682e-06	161313	8.85172e-06	10	2003-10-01		not listed
VALDECOXIB + TRYPSIN-CHYMOTRYPSIN | M1A76	0	0	0	0	1	2008-09-01		not listed
Other' NSAID FDC products	18773252	0.0256156	6.59972e+08	0.0362146
TOTAL: Pre- Post-1st May 2002, Other	732882928		1.82239e+10
Volume in Units of 10 tablets/capsules; Value in Rupees (INR)
	FDC Volume (Units) Nov11-Oct12	% Total FDC volume	FDC Value (INR) Nov11-Oct12	% Total FDC value
Marketed Before 1st May 2002	539726673	0.736443	9.98378e+09	0.54784
CDSCO-approved	463213161	0.632043	7.89626e+09	0.433291
Unapproved	76513512	0.104401	2.08752e+09	0.114549
Marketed after 1st May 2002	174383003	0.237941	7.58015e+09	0.415945
CDSCO-approved	45031599	0.0614445	2.88488e+09	0.158302
Unapproved	129351404	0.176497	4.69527e+09	0.257643
CDSCO ever-approved formulations	508244760	0.693487	1.07811e+10	0.591593
Unapproved	205864916	0.280897	6.78279e+09	0.372192
Other	18773252	0.0256156	6.59972e+08	0.0362146
Total	732882928	1	1.82239e+10	1
Volumes and values for sales in 2011-12 of NSAID FDC formulations marketed Pre- and Post-1May2002
Pre 1May02 Volume	Sales volume 2011-12	% Pre-May 2002 Volume	Post 1May02 Volume	Sales volume 2011-12	% Post-May 2002 Volume	Total Units Pre 1May02	539726673	0.736443
Approved: Units total	463213161	0.858237	Approved: Units total	45031599	0.258234	Total Post May02	174383003	0.237941
Not approved total	76513512	0.141763	Not approved total	129351404	0.741766	Other	18773252	0.0256156
Total Units Pre 1May02 Volume	539726673	1	Total Units Post 1May02 Volume	174383003	1	Total NSAID FDC Units 2011-12	732882928	1
Pre 1May02 Value	Sales value 2011-12	% Pre-May 2002 Value	Post 1May02 Value	Sales value 2011-12	% Post-May 2002 Value	Value Pre May02	9.98378e+09	0.54784
Approved: Value total	7.89626e+09	0.790909	Approved	2.88488e+09	0.380584	Value Post May02	7.58015e+09	0.415945
Not approved total	2.08752e+09	0.209091	Not approved	4.69527e+09	0.619416	Other	6.59972e+08	0.0362146
Pre May02 Total Value	9.98378e+09	1	Post May02 Total Value	7.58015e+09	1	Total NSAID FDC Value 2011-12	1.82239e+10	1
Volume in Units of 10 tablets/capsules
Value in Rupees
Pre_Post 1May02 Units approved	508244760	0.693487
Pre_Post 1May02 Units not approved	205864916	0.280897
Other	18773252	0.0256156
Total Units 2011-12	732882928	1
